# Supplementary material for: Immunogenicity in humans of a transdermal multipeptide melanoma vaccine administered with or without a TLR7 agonist
Source: PubMed Central journal article supplement — J Immunother Cancer. 2021 May 25;9(5):e002214. doi: 10.1136/jitc-2020-002214 (PMC8154977; doi:10.1136/jitc-2020-002214), 2021-05-25
Supplement: jitc-2020-002214supp001.pdf [file jitc-2020-002214supp001.pdf]

## Supplemental Text

| <b>Supplemental Table 1: 12 melanoma peptide (12-MP) vaccine composition</b> |                  |                                                            |
|------------------------------------------------------------------------------|------------------|------------------------------------------------------------|
| <b>Allele</b>                                                                | <b>Sequence</b>  | <b>Epitope</b>                                             |
| HLA-A1                                                                       | DAEKSDICTDEY     | Tyrosinase <sub>240-251</sub> <sup>a</sup>                 |
|                                                                              | SSDYVIPIGTY      | Tyrosinase <sub>146-156</sub>                              |
|                                                                              | EADPTGHSY        | MAGE-A1 <sub>161-169</sub>                                 |
|                                                                              | EVDPIGHLY        | MAGE-A3 <sub>168-176</sub>                                 |
| HLA-A2                                                                       | YMDGTMSQV        | Tyrosinase <sub>369-377</sub> <sup>b</sup>                 |
|                                                                              | IMDQVPFSV        | gp100 <sub>209-217</sub> <sup>c</sup>                      |
|                                                                              | YLEPGPVTA        | gp100 <sub>280-288</sub>                                   |
| HLA-A3/A11                                                                   | GLYDGMEHL        | MAGE-A10 <sub>254-262</sub>                                |
|                                                                              | ALLAVGATK        | gp100 <sub>17-25</sub>                                     |
|                                                                              | LIYRRRLMK        | gp100 <sub>614-622</sub>                                   |
|                                                                              | SLFRAVITK        | MAGE-A1 <sub>96-104</sub>                                  |
| Tetanus peptide                                                              | ASGPGGGAPR       | NY-ESO-1 <sub>53-62</sub>                                  |
|                                                                              | AQYIKANSKFIGITEL | Modified tetanus toxoid p2 <sub>830-844</sub> <sup>d</sup> |

<sup>a</sup> substitution of S for C at residue 244  
<sup>b</sup> post-translational change of N to D at residue 371  
<sup>c</sup> 209-2M, substitution of M for T at residue 210  
<sup>d</sup> alanine residue added to prevent cyclization of the N-terminal glutamine

All peptides were synthesized directly from amino acids and purified under GMP conditions by Multiple Peptide Systems (now Polypeptide Group, San Diego, CA). Lyophilized peptides were reconstituted, mixed, and vialled under GMP conditions by Clinalfa (Merck Biosciences AG, Laufelfingen, Switzerland). The peptides were supplied as individual use vials of lyophilized peptide, one vial containing the 12MP mixture, and one containing the tetanus helper peptide. The vials of lyophilized peptide are stored at a temperature  $\leq -70^{\circ}\text{C}$  and protected from light. Once thawed, the vial(s) were used for preparation of the vaccine within three hours. Quality-assurance/quality control testing of the mixtures included sterility, identity, purity, potency, general safety, pyrogenicity, and stability.

Supplemental Table 2. IFN $\gamma$ -secreting cells per 100,000 CD8 T cells in peripheral blood (IVS ELISpot)

| HLA Type | VMM       | Arm | Pre-Treatment |        |        |       |       | Week 1  |              |              |        |              | Week 2  |              |              |        |            | Week 3  |              |              |       |              | Week 5  |              |              |        |              | Week 8  |               |              |              |              | Week 11 |              |               |              |              | Week 12 |              |              |       |              | Resp? |     |
|----------|-----------|-----|---------------|--------|--------|-------|-------|---------|--------------|--------------|--------|--------------|---------|--------------|--------------|--------|------------|---------|--------------|--------------|-------|--------------|---------|--------------|--------------|--------|--------------|---------|---------------|--------------|--------------|--------------|---------|--------------|---------------|--------------|--------------|---------|--------------|--------------|-------|--------------|-------|-----|
|          |           |     | Control       | DAEK   | EAD    | EVD   | SSD   | Control | DAEK         | EAD          | EVD    | SSD          | Control | DAEK         | EAD          | EVD    | SSD        | Control | DAEK         | EAD          | EVD   | SSD          | Control | DAEK         | EAD          | EVD    | SSD          | Control | DAEK          | EAD          | EVD          | SSD          | Control | DAEK         | EAD           | EVD          | SSD          | Control | DAEK         | EAD          | EVD   | SSD          |       |     |
| HLA-A1   | VMM 325*  | 1   | 632           | 1,202  | 533    | 648   | 484   | 215     | <b>1,127</b> | 219          | 199    | 206          | 703     | 1,113        | 871          | 693    | 552        | 260     | <b>2,352</b> | 183          | 241   | 221          | 200     | <b>2,429</b> | 180          | 189    | 205          | 85      | <b>2,286</b>  | 62           | 95           | 105          | 288     | <b>2,296</b> | 209           | 236          | 256          | 168     | <b>1,924</b> | 134          | 151   | 182          | Yes   |     |
|          | VMM 704   | 1   | 785           | 677    | 682    | 716   | 668   | 2,481   | 2,567        | 1,930        | 1,737  | 2,241        | 1,359   | 1,414        | 1,391        | 1,441  | 1,082      | 767     | 933          | 608          | 542   | 736          | 1,190   | 1,118        | 1,286        | 1,516  | 1,056        | 1,537   | 2,361         | 1,357        | 1,456        | 1,442        | 1,650   | 2,206        | 1,783         | 2,615        | 1,612        | 732     | <b>2,645</b> | 578          | 1,456 | 653          | Yes   |     |
|          | VMM 717*  | 1   | 3,179         | 3,136  | 2,972  | 3,203 | 2,628 | 2,694   | 2,909        | 2,455        | 2,173  | 2,776        | 2,673   | 2,604        | 2,356        | 2,397  | 2,251      | 2,701   | 3,534        | 2,263        | 2,169 | 2,281        | 1,189   | 1,018        | 1,046        | 1,228  | 1,090        | 1,119   | <b>4,629</b>  | 985          | 1,020        | 1,091        | 657     | <b>6,920</b> | 564           | 649          | 582          | 1,206   | <b>6,785</b> | 1,137        | 1,252 | 1,151        | Yes   |     |
|          | VMM 734   | 1   | 19            | 35     | 8      | 20    | 18    | 246     | 195          | 159          | 242    | 227          | 95      | 76           | 29           | 51     | 80         | 210     | 183          | 148          | 178   | 166          | 145     | 179          | 160          | 168    | 157          | 288     | 305           | 285          | 336          | 265          | 72      | 73           | 25            | 36           | 34           | 108     | 127          | 114          | 147   | 126          | No    |     |
|          | VMM 769   | 1   | 972           | 1,014  | 1,007  | 1,062 | 1,143 | 1,108   | 1,108        | 907          | 1,085  | 1,380        | 1,044   | 1,171        | 831          | 948    | 1,133      | 1,036   | 1,170        | 948          | 935   | 1,052        | 1,648   | 1,584        | 1,689        | 1,754  | 1,461        | 816     | <b>2,228</b>  | 680          | 1,079        | 1,154        | 1,094   | <b>2,795</b> | 1,209         | 1,389        | 978          | X       | X            | X            | X     | X            | Yes   |     |
|          | VMM 680*  | 2   | 382           | 349    | 375    | 470   | 328   | 321     | 275          | 312          | 343    | 211          | 530     | 493          | 472          | 669    | 484        | 891     | 1,015        | 879          | 919   | 1,038        | 290     | 254          | 301          | 213    | 258          | 1,164   | 2,037         | 1,128        | 1,278        | 1,087        | X       | X            | X             | X            | X            | X       | X            | X            | X     | No           |       |     |
|          | VMM 851   | 2   | 4,417         | 4,790  | 4,576  | 5,125 | 3,525 | 8,017   | 7,244        | 8,083        | 7,198  | 5,793        | X       | X            | X            | X      | X          | 1,198   | 1,104        | 1,512        | 1,461 | 980          | 2,171   | 1,987        | 1,951        | 1,830  | 1,665        | 400     | <b>11,123</b> | 479          | 829          | 468          | X       | X            | X             | X            | X            | X       | X            | X            | X     | Yes          |       |     |
|          | VMM 672   | 3   | 114           | 108    | 116    | 82    | 130   | 656     | 525          | 401          | 466    | 575          | 470     | <b>2,889</b> | 283          | 374    | 282        | 421     | <b>5,787</b> | 284          | 375   | 524          | 3,487   | 5,171        | 3,451        | 3,271  | 2,839        | 598     | <b>4,443</b>  | 353          | 525          | 526          | 495     | <b>4,946</b> | 513           | 596          | 385          | X       | X            | X            | X     | X            | Yes   |     |
|          | VMM 770   | 3   | 312           | 437    | 324    | 344   | 430   | 351     | <b>1,123</b> | 472          | 500    | 407          | 527     | <b>1,692</b> | 522          | 646    | 640        | 505     | 1,054        | 546          | 536   | 635          | 293     | 698          | 307          | 309    | 369          | 654     | 1,024         | 641          | 753          | 969          | 1,031   | 1,752        | 952           | 1,153        | 1,018        | 743     | 1,115        | 810          | 787   | 1,566        | Yes   |     |
|          | VMM 696*  | 4   | 364           | 340    | 411    | 346   | 262   | 1,211   | 1,062        | 1,207        | 1,246  | 964          | 199     | 182          | 131          | 142    | 160        | 832     | <b>2,519</b> | 690          | 727   | 594          | 1,132   | <b>2,342</b> | 1,134        | 1,120  | 956          | X       | X             | X            | X            | X            | X       | X            | X             | X            | X            | X       | X            | X            | X     | Yes          |       |     |
| HLA-A2   | VMM 325*  | 1   | 803           | 789    | 968    | 917   | 1,004 | 340     | 370          | 518          | 369    | <b>1,129</b> | 820     | 706          | 944          | 905    | 825        | 430     | 453          | 416          | 418   | 639          | 339     | 348          | 342          | 351    | 477          | 276     | 298           | 343          | 257          | 647          | 407     | 612          | 407           | 439          | 642          | 331     | 375          | 291          | 357   | 411          | Yes   |     |
|          | VMM 717*  | 1   | 1,404         | 1,468  | 3,292  | 2,220 | 1,405 | 1,648   | 1,531        | 2,949        | 1,762  | 1,624        | 1,059   | 1,083        | 2,254        | 1,592  | 974        | 1,084   | 853          | 1,279        | 1,364 | 1,190        | 646     | 677          | 1,494        | 610    | 614          | 625     | <b>3,525</b>  | <b>3,182</b> | 957          | 661          | 429     | <b>2,450</b> | <b>3,671</b>  | 833          | 440          | 634     | <b>1,824</b> | <b>5,007</b> | 808   | 837          | Yes   |     |
|          | VMM 724   | 1   | 278           | 316    | 2,650  | 282   | 302   | 440     | 395          | 2,676        | 483    | 488          | 244     | 265          | 3,700        | 254    | 331        | 564     | 500          | 2,682        | 640   | 588          | 244     | 249          | 4,432        | 235    | 250          | 270     | 441           | 3,917        | 312          | 499          | X       | X            | X             | X            | X            | X       | X            | X            | X     | No           |       |     |
|          | VMM 750   | 1   | 673           | 597    | 735    | 512   | 789   | 578     | 557          | <b>1,336</b> | 615    | 505          | 398     | 353          | 337          | 419    | 354        | 846     | 946          | <b>2,488</b> | 957   | 787          | 614     | 571          | 988          | 569    | 611          | X       | X             | X            | X            | X            | 367     | <b>5,435</b> | <b>5,014</b>  | 351          | 722          | 192     | <b>1,971</b> | <b>2,137</b> | 179   | <b>1,353</b> | Yes   |     |
|          | VMM 680*  | 2   | 956           | 798    | 849    | 963   | 849   | 670     | 419          | 489          | 480    | 554          | 908     | 768          | 1,013        | 841    | 950        | 1,260   | 1,149        | 1,002        | 815   | 1,095        | 1,050   | 1,185        | 1,384        | 1,143  | 946          | 602     | 907           | <b>2,743</b> | 636          | 526          | X       | X            | X             | X            | X            | X       | X            | X            | X     | Yes          |       |     |
|          | VMM 689   | 2   | 480           | 362    | 253    | 358   | 282   | 616     | 621          | 459          | 776    | 633          | 847     | 806          | 776          | 666    | 696        | 937     | 865          | 695          | 999   | 941          | 927     | 916          | 846          | 716    | 731          | 433     | <b>3,993</b>  | <b>2,775</b> | 493          | <b>1,652</b> | X       | X            | X             | X            | X            | X       | X            | X            | Yes   |              |       |     |
|          | VMM 764   | 2   | 1,706         | 1,679  | 1,419  | 1,427 | 1,565 | 396     | 390          | 447          | 353    | 341          | 1,678   | 1,397        | 1,411        | 1,482  | 1,425      | 2,145   | 1,746        | 1,641        | 1,637 | 1,583        | 1,509   | 1,250        | 1,275        | 1,287  | 1,239        | 480     | 491           | 381          | 490          | 526          | 234     | 206          | 245           | 240          | 251          | 2,223   | <b>8,089</b> | 2,026        | 1,641 | 2,490        | Yes   |     |
|          | VMM 793   | 2   | 651           | 643    | 638    | 591   | 358   | 766     | 756          | 718          | 651    | 612          | 867     | 860          | 701          | 694    | 633        | 984     | 951          | 1,004        | 805   | 706          | 678     | 584          | 709          | 537    | 655          | 1,404   | 2,723         | 2,580        | 1,190        | 2,514        | 702     | <b>2,170</b> | 1,389         | 629          | 1,258        | 773     | <b>6,254</b> | <b>2,646</b> | 659   | 1,174        | Yes   |     |
|          | VMM 831   | 2   | 1,683         | 1,296  | 1,441  | 1,579 | 1,291 | 1,307   | 1,134        | 1,136        | 1,231  | 937          | 861     | 910          | 1,117        | 866    | 1,222      | 710     | <b>4,508</b> | <b>2,347</b> | 649   | 810          | 1,333   | 1,279        | 1,340        | 1,283  | 1,128        | 2,531   | 2,252         | 3,275        | 2,233        | 2,626        | 559     | 544          | <b>1,177</b>  | 544          | 529          | 1,314   | 1,323        | <b>2,639</b> | 1,307 | 1,525        | Yes   |     |
|          | VMM 695   | 3   | 409           | 385    | 327    | 384   | 352   | 8,462   | 5,903        | 6,203        | 7,013  | 6,606        | 3,484   | 3,655        | 2,857        | 2,967  | 2,982      | 1,437   | <b>8,127</b> | 1,138        | 1,197 | 1,239        | 2,531   | 2,887        | 2,481        | 2,185  | 2,335        | 1,661   | 1,625         | 1,249        | 1,374        | 1,422        | 1,640   | <b>4,720</b> | 1,401         | 1,450        | 1,437        | 1,716   | 1,878        | 1,295        | 1,583 | 1,409        | Yes   |     |
|          | VMM 720** | 3   | 3,062         | 2,396  | 2,456  | 2,959 | 2,697 | X       | X            | X            | X      | X            | X       | X            | X            | X      | X          | X       | X            | X            | X     | X            | X       | X            | X            | X      | X            | X       | 1,341         | 1,506        | <b>5,010</b> | 1,635        | 1,378   | 1,690        | <b>6,539</b>  | <b>5,445</b> | 2,106        | 1,616   | 2,013        | <b>4,787</b> | 3,369 | 2,165        | 1,640 | Yes |
|          | VMM 733   | 3   | 273           | 261    | 239    | 293   | 336   | 31,993  | 30,199       | 29,419       | 28,721 | 29,037       | 3,129   | 2,983        | <b>7,707</b> | 2,704  | 2,601      | 3,165   | 2,892        | 3,565        | 2,882 | 2,823        | 2,181   | 2,142        | <b>5,641</b> | 1,957  | 1,965        | 7,971   | 7,005         | 10,103       | 7,186        | 6,244        | 5,411   | 6,356        | <b>13,853</b> | 4,718        | 4,536        | X       | X            | X            | X     | X            | Yes   |     |
|          | VMM 763   | 3   | 10,464        | 15,450 | 15,310 | 9,860 | 8,458 | 25,699  | 27,778       | 26,619       | 24,122 | 21,876       | 22,425  | 25,038       | 23,191       | 21,482 | 19,485     | 6,253   | 5,654        | 6,971        | 6,107 | 5,416        | 20,353  | 20,289       | 17,163       | 19,786 | 17,923       | X       | X             | X            | X            | X            | 2,596   | 5,593        | 3,297         | 2,374        | 2,976        | 3,967   | 5,525        | 5,536        | 2,926 | 2,871        | No    |     |
|          | VMM 848   | 3   | 3,908         | 3,511  | 3,902  | 3,165 | 3,096 | 3,989   | 4,036        | 3,929        | 3,589  | 3,347        | 756     | <b>4,060</b> | 704          | 708    | 595        | 3,693   | 3,708        | 5,688        | 3,306 | 3,419        | 3,805   | 4,097        | 4,259        | 3,662  | 3,058        | 830     | 936           | <b>2,365</b> | 829          | 624          | X       | X            | X             | X            | X            | X       | X            | X            | Yes   |              |       |     |
|          | VMM 696*  | 4   | 557           | 607    | 681    | 804   | 547   | 958     | 771          | 825          | 1,117  | 1,040        | 187     | 178          | <b>602</b>   | 237    | 173        | 691     | 667          | 1,499        | 897   | 756          | 1,060   | 954          | 2,341        | 1,104  | 965          | X       | X             | X            | X            | X            | X       | X            | X             | X            | X            | X       | X            | X            | Yes   |              |       |     |
|          | VMM 705   | 4   | 151           | 124    | 63     | 67    | 72    | 347     | 281          | 155          | 181    | 209          | 426     | <b>966</b>   | <b>2,509</b> | 73     | <b>498</b> | 362     | <b>1,079</b> | <b>1,714</b> | 107   | 911          | 306     | 262          | 553          | 333    | 275          | 473     | <b>1,041</b>  | 345          | 83           | 503          | 234     | 268          | 220           | 50           | 90           | 229     | <b>622</b>   | <b>506</b>   | 77    | 225          | Yes   |     |
|          | VMM 707   | 4   | 397           | 387    | 439    | 336   | 297   | 272     | <b>231</b>   | <b>6,867</b> | 194    | 218          | 165     | <b>1,434</b> | <b>5,891</b> | 121    | 326        | 254     | <b>3,688</b> | <b>3,137</b> | 213   | <b>2,962</b> | 211     | <b>2,458</b> | <b>4,772</b> | 163    | <b>1,502</b> | 158     | <b>2,847</b>  | <b>3,005</b> | 114          | <b>670</b>   | 271     | <b>3,303</b> | <b>3,568</b>  | 231          | <b>1,085</b> | 175     | <b>2,199</b> | <b>1,750</b> | 173   | <b>695</b>   | Yes   |     |
|          | VMM 714   | 4   | 1,888         | 1,690  | 1,531  | 1,496 | 1,463 | 554     | 587          | 624          | 480    | 465          | 891     | 711          | 696          | 730    | 709        | 2,728   | 2,293        | 2,168        | 2,127 | 2,092        | 1,905   | 1,536        | 1,495        | 1,572  | 1,545        | 1,484   | 1,061         | 1,340        | 1,292        | 1,869        | 299     |              |               |              |              |         |              |              |       |              |       |     |

Supplemental Table 3. IFN $\gamma$ -secreting cells per 100,000 CD8 T cells in peripheral blood (Direct ELISpot)

| HLA Type  | VMM      | Arm  | Pre-Treatment |         |       |       |         | Week 1  |         |         |       |         | Week 2  |             |       |       |       | Week 3      |              |         |         |             | Week 5  |             |             |             |       | Week 8  |             |         |             |         | Week 11 |             |              |       |       | Week 12 |       |       |             |       | Resp? |
|-----------|----------|------|---------------|---------|-------|-------|---------|---------|---------|---------|-------|---------|---------|-------------|-------|-------|-------|-------------|--------------|---------|---------|-------------|---------|-------------|-------------|-------------|-------|---------|-------------|---------|-------------|---------|---------|-------------|--------------|-------|-------|---------|-------|-------|-------------|-------|-------|
|           |          |      | Control       | DAEK    | EAD   | EVD   | SSD     | Control | DAEK    | EAD     | EVD   | SSD     | Control | DAEK        | EAD   | EVD   | SSD   | Control     | DAEK         | EAD     | EVD     | SSD         | Control | DAEK        | EAD         | EVD         | SSD   | Control | DAEK        | EAD     | EVD         | SSD     | Control | DAEK        | EAD          | EVD   | SSD   | Control | DAEK  | EAD   | EVD         | SSD   |       |
| HLA-A1    | VMM 325* | 1    | 18.3          | 12.2    | 10.3  | 27.2  | 24.0    | 8.4     | 7.1     | 12.0    | 17.3  | 7.6     | 7.7     | 12.5        | 6.9   | 11.6  | 5.6   | 24.0        | 29.3         | 24.5    | 23.6    | 26.7        | 10.9    | 11.4        | 18.9        | 25.6        | 9.5   | 4.4     | 8.2         | 7.3     | 4.8         | 3.4     | 12.4    | 12.8        | 9.1          | 16.1  | 10.7  | 10.4    | 3.6   | 5.2   | 10.9        | 7.8   | No    |
|           | VMM 704  | 1    | 14.3          | 17.7    | 2.7   | 27.2  | 15.6    | 5.0     | 10.6    | 16.3    | 10.6  | 2.8     | 2.0     | 6.0         | 2.7   | 4.7   | 2.7   | 10.1        | 12.7         | 7.4     | 22.8    | 2.7         | 3.5     | 10.6        | 16.2        | <b>27.5</b> | 4.9   | 3.6     | 4.2         | 4.2     | 1.2         | 2.4     | 8.7     | 7.9         | 7.1          | 10.3  | 7.9   | 6.5     | 9.4   | 7.9   | 6.5         | 1.4   | Yes   |
|           | VMM 717* | 1    | 9.3           | 11.9    | 14.4  | 14.4  | 16.5    | 7.7     | 12.8    | 7.3     | 10.8  | 13.1    | 3.4     | 5.7         | 5.3   | 9.5   | 3.4   | 8.4         | 8.4          | 9.1     | 10.5    | 7.6         | 6.9     | 10.9        | 10.5        | 18.5        | 18.1  | 8.3     | 13.6        | 9.5     | 16.6        | 6.0     | 11.3    | 15.2        | 12.1         | 20.2  | 14.2  | X       | X     | X     | X           | X     | No    |
|           | VMM 734  | 1    | 17.3          | 28.2    | 33.1  | 29.6  | 25.2    | 6.5     | 7.5     | 7.0     | 15.4  | 14.9    | 5.2     | 9.0         | 5.7   | 10.9  | 8.1   | 7.0         | 18.7         | 19.3    | 26.3    | <b>29.3</b> | 4.0     | 14.5        | 17.0        | 18.5        | 15.5  | 3.5     | 11.1        | 13.7    | 12.1        | 10.1    | 12.2    | 16.5        | 13.8         | 17.6  | 13.3  | 10.1    | 7.4   | 19.7  | 17.5        | 7.4   | Yes   |
|           | VMM 769  | 1    | 1,042.0       | 1,142.4 | 984.0 | 980.4 | 1,058.1 | 1,121.8 | 1,054.4 | 1,043.6 | 954.6 | 1,020.3 | 901.6   | 1,038.2     | 916.0 | 767.1 | 989.9 | 1,225.3     | 1,155.2      | 1,244.8 | 1,213.7 | 1,092.9     | 487.0   | 502.9       | 501.9       | 520.2       | 491.3 | 1,180.7 | 1,164.6     | 1,323.3 | 1,057.0     | 1,132.3 | 122.4   | 172.7       | 178.2        | 161.7 | 155.3 | X       | X     | X     | X           | X     | No    |
|           | VMM 680* | 2    | 28.9          | 27.8    | 36.7  | 37.8  | 33.4    | 8.1     | 16.2    | 17.2    | 15.2  | 20.3    | 6.8     | 11.3        | 7.9   | 20.3  | 22.6  | 32.4        | 47.8         | 48.7    | 66.6    | 37.6        | 2.6     | 13.2        | <b>29.0</b> | <b>28.1</b> | 7.9   | 16.9    | 38.6        | 32.2    | <b>54.7</b> | 39.4    | 59.6    | 122.3       | <b>160.8</b> | 120.0 | 105.1 | 2.7     | 8.1   | 12.7  | <b>25.3</b> | 8.1   | Yes   |
|           | VMM 851  | 2    | X             | X       | X     | X     | X       | X       | X       | X       | X     | X       | X       | X           | X     | X     | X     | X           | X            | X       | X       | X           | X       | X           | X           | X           | X     | X       | X           | X       | X           | X       | X       | X           | X            | X     | X     | X       | X     | X     | NA          |       |       |
|           | VMM 672  | 3    | 5.2           | 4.0     | 7.5   | 2.9   | 3.5     | 2.3     | 1.4     | 2.3     | 2.7   | 1.8     | 2.0     | 3.5         | 3.0   | 1.5   | 0.5   | 4.9         | 4.4          | 2.4     | 3.4     | 5.4         | 1.5     | 5.5         | 3.5         | 2.5         | 3.5   | 4.5     | 5.0         | 3.0     | 3.5         | 6.5     | 3.2     | 2.1         | 1.6          | 3.2   | 1.6   | 4.8     | 1.1   | 2.7   | 2.7         | 3.7   | No    |
|           | VMM 770  | 3    | 184.8         | 144.6   | 190.0 | 135.6 | 127.0   | 54.9    | 28.4    | 38.5    | 54.0  | 52.2    | 92.4    | 94.9        | 79.6  | 105.3 | 91.2  | 790.1       | 701.6        | 790.1   | 706.6   | 788.0       | 233.0   | 231.3       | 194.6       | 189.7       | 196.7 | 542.2   | 561.8       | 528.3   | 519.2       | 544.5   | 524.2   | 524.8       | 566.2        | 518.8 | 518.8 | 261.9   | 306.4 | 347.7 | 305.7       | 302.0 | No    |
|           | VMM 696* | 4    | 5.1           | 6.2     | 6.2   | 13.1  | 8.4     | 5.6     | 9.6     | 9.0     | 15.5  | 8.7     | 5.2     | 9.1         | 9.9   | 12.3  | 7.2   | 15.5        | 9.9          | 13.8    | 18.5    | 8.6         | 6.7     | 10.6        | 9.4         | 17.7        | 9.0   | 1.5     | 2.2         | 2.2     | 2.2         | 0.0     | 7.8     | 5.3         | 11.0         | 12.7  | 7.4   | X       | X     | X     | X           | X     | No    |
| HLA-A2    |          |      | Control       | GLY     | IMD   | YLE   | YMD     | Control | GLY     | IMD     | YLE   | YMD     | Control | GLY         | IMD   | YLE   | YMD   | Control     | GLY          | IMD     | YLE     | YMD         | Control | GLY         | IMD         | YLE         | YMD   | Control | GLY         | IMD     | YLE         | YMD     | Control | GLY         | IMD          | YLE   | YMD   | Control | GLY   | IMD   | YLE         | YMD   |       |
|           | VMM 325* | 1    | 5.0           | 20.7    | 17.9  | 10.3  | 10.8    | 9.7     | 3.1     | 5.3     | 3.6   | 6.7     | 2.9     | 7.7         | 6.9   | 3.9   | 2.2   | 9.6         | 13.6         | 16.6    | 7.4     | 12.2        | 10.1    | 4.3         | 3.8         | 2.4         | 3.3   | 4.6     | 6.4         | 5.2     | 5.8         | 3.2     | 4.7     | 274.9       | 14.4         | 8.3   | 5.4   | 3.6     | 2.1   | 4.7   | 5.7         | 4.7   | No    |
|           | VMM 717* | 1    | 9.3           | 10.6    | 9.3   | 9.8   | 8.5     | 7.7     | 8.1     | 7.3     | 12.0  | 4.6     | 3.4     | 7.6         | 4.9   | 9.8   | 6.8   | 8.4         | 8.4          | 8.0     | 6.9     | 7.3         | 6.9     | 8.7         | 6.9         | 5.4         | 5.1   | 8.3     | 9.8         | 9.8     | 4.2         | 4.2     | 11.3    | 16.7        | 14.2         | 14.9  | 14.9  | X       | X     | X     | X           | X     | No    |
|           | VMM 750  | 1    | 8.6           | 9.2     | 4.6   | 13.7  | 6.9     | 7.7     | 26.8    | 15.3    | 15.3  | 14.0    | 12.7    | 11.0        | 12.7  | 18.0  | 19.7  | 22.6        | 20.8         | 28.1    | 17.7    | 22.6        | 6.6     | 19.3        | 11.5        | 12.1        | 7.9   | 9.2     | 21.0        | 26.3    | 13.8        | 9.9     | 20.8    | 35.4        | 15.3         | 24.3  | 17.3  | 10.8    | 28.9  | 22.9  | 19.3        | 11.4  | No    |
|           | VMM 724  | 1    | 11.4          | 19.1    | 28.2  | 8.8   | 11.9    | 9.3     | 12.7    | 20.0    | 9.3   | 7.8     | 6.4     | 12.2        | 21.3  | 8.0   | 14.4  | 12.4        | 10.2         | 22.6    | 13.5    | 8.6         | 4.1     | 6.7         | 19.1        | 6.2         | 7.2   | 8.0     | 5.7         | 34.7    | 13.1        | 13.1    | 14.1    | 18.2        | 38.5         | 10.4  | 20.8  | 15.7    | 30.4  | 42.8  | 12.5        | 11.9  | No    |
|           | VMM 680* | 2    | 28.9          | 35.6    | 17.8  | 42.3  | 12.2    | 8.1     | 9.1     | 5.1     | 11.2  | 2.0     | 6.8     | 13.6        | 3.4   | 7.9   | 4.5   | 32.4        | 52.1         | 32.4    | 42.7    | 16.2        | 2.6     | 15.8        | 8.8         | 11.4        | 2.6   | 16.9    | 27.3        | 21.7    | 27.3        | 7.2     | 59.6    | 125.5       | 82.3         | 92.5  | 33.7  | 2.7     | 4.5   | 4.5   | 13.6        | 3.6   | No    |
|           | VMM 689  | 2    | 22.6          | 5.6     | 9.0   | 14.1  | 9.0     | 22.4    | 32.2    | 21.3    | 19.6  | 16.1    | 22.2    | 12.8        | 16.3  | 12.3  | 18.7  | 29.2        | 21.9         | 30.5    | 29.2    | 40.8        | 11.5    | <b>33.1</b> | 22.6        | 15.2        | 12.6  | 10.3    | 21.2        | 22.9    | 16.0        | 16.6    | 10.1    | <b>59.4</b> | <b>41.4</b>  | 20.2  | 27.4  | 10.0    | 37.8  | 25.0  | 10.7        | 10.7  | Yes   |
|           | VMM 764  | 2    | 10.2          | 22.0    | 11.0  | 10.2  | 10.2    | 16.0    | 10.6    | 20.6    | 18.6  | 14.6    | 7.5     | 20.3        | 12.2  | 8.1   | 11.6  | 18.3        | 28.3         | 13.3    | 10.5    | 21.6        | 11.7    | 26.3        | 22.8        | 21.6        | 14.0  | 12.3    | 12.3        | 9.7     | 5.8         | 16.8    | 21.0    | 20.4        | 17.4         | 14.4  | 18.0  | 27.5    | 14.7  | 8.7   | 17.4        | 6.7   | No    |
|           | VMM 793  | 2    | 24.6          | 28.8    | 29.5  | 20.4  | 21.8    | 34.0    | 26.3    | 30.8    | 34.0  | 32.7    | 46.3    | 45.7        | 47.0  | 51.9  | 42.2  | 52.5        | 55.6         | 68.1    | 44.6    | 57.2        | 29.0    | 33.4        | 29.6        | 35.2        | 31.5  | 14.2    | 13.5        | 12.8    | 18.9        | 16.9    | 749.7   | 686.3       | 715.8        | 717.3 | 726.6 | 94.9    | 74.6  | 78.3  | 77.4        | 95.8  | No    |
|           | VMM 831  | 2    | 365.0         | 368.1   | 382.7 | 388.9 | 378.9   | 377.1   | 403.8   | 451.3   | 420.9 | 397.9   | 44.2    | 48.5        | 59.3  | 33.9  | 48.5  | 80.9        | 80.4         | 87.5    | 88.2    | 69.1        | 46.8    | 71.6        | 91.7        | 68.8        | 66.8  | 29.2    | 20.7        | 33.4    | 41.4        | 42.6    | 25.5    | 25.5        | 22.3         | 28.7  | 16.7  | 155.6   | 144.4 | 171.0 | 137.5       | 160.6 | No    |
| VMM 695   | 3        | 97.8 | 86.5          | 83.3    | 107.4 | 68.9  | 74.4    | 55.2    | 33.6    | 33.6    | 55.2  | 36.2    | 45.8    | 32.5        | 30.1  | 42.2  | 137.1 | 130.6       | 96.7         | 113.6   | 83.6    | 121.9       | 115.7   | 115.7       | 51.0        | 89.6        | 59.3  | 62.6    | 40.6        | 30.8    | 45.0        | 93.8    | 114.5   | 97.5        | 103.6        | 104.8 | 126.6 | 75.0    | 62.1  | 59.8  | 62.1        | No    |       |
| VMM 720** | 3        | 12.5 | 13.5          | 10.8    | 10.8  | 11.4  | X       | X       | X       | X       | X     | 16.2    | 15.0    | 12.8        | 10.0  | 12.8  | 10.6  | 11.5        | 9.0          | 12.2    | 12.8    | 3.0         | 6.0     | 0.0         | 0.0         | 0.0         | 20.8  | 23.0    | <b>46.5</b> | 13.7    | 14.8        | 11.3    | 17.7    | 18.7        | 8.8          | 10.3  | X     | X       | X     | X     | X           | Yes   |       |
| VMM 733   | 3        | 5.4  | 2.6           | 10.2    | 7.6   | 4.7   | X       | X       | X       | X       | X     | 9.6     | 12.5    | 13.1        | 0.0   | 16.1  | X     | X           | X            | X       | X       | 6.6         | 6.3     | 13.6        | 5.7         | 8.8         | 13.2  | 9.9     | 19.3        | 1.9     | 12.5        | 11.4    | 4.2     | 13.6        | 5.1          | 6.7   | X     | X       | X     | X     | X           | No    |       |
| VMM 763   | 3        | 15.2 | 17.1          | 21.0    | 13.3  | 11.4  | 4.4     | 7.8     | 4.4     | 8.9     | 3.3   | 3.5     | 8.7     | 9.6         | 11.3  | 13.1  | 23.2  | 28.0        | 24.5         | 25.2    | 32.1    | 2.7         | 6.3     | 5.4         | 4.5         | 1.8         | 63.7  | 69.3    | 62.1        | 57.4    | 68.5        | 39.2    | 36.9    | 48.7        | 45.3         | 43.1  | 58.2  | 87.4    | 72.4  | 60.5  | 74.7        | No    |       |
| VMM 848   | 3        | 68.4 | 78.4          | 80.8    | 80.0  | 81.6  | 96.5    | 119.1   | 105.0   | 120.6   | 120.6 | 734.1   | 679.3   | 747.4       | 762.5 | 731.3 | 126.5 | 119.4       | 146.6        | 145.4   | 131.2   | 55.1        | 44.3    | 51.8        | 51.8        | 55.1        | X     | X       | X           | X       | X           | 21.2    | 42.4    | 31.0        | 37.5         | 39.1  | 227.7 | 254.6   | 250.2 | 258.9 | 223.0       | No    |       |
| VMM 696*  | 4        | 5.1  | 7.3           | 8.4     | 8.8   | 5.1   | 5.6     | 4.0     | 5.9     | 3.1     | 3.4   | 5.2     | 13.1    | 6.0         | 6.8   | 0.8   | 15.5  | 9.5         | 9.9          | 6.5     | 0.9     | 6.7         | 6.7     | 10.6        | 10.6        | 3.9         | 1.5   | 1.5     | 1.5         | 4.5     | 0.0         | 7.8     | 5.3     | 7.0         | 9.8          | 4.5   | X     | X       | X     | X     | X           | No    |       |
| VMM 705   | 4        | 23.1 | 26.8          | 29.9    | 27.6  | 21.9  | 20.7    | 36.8    | 16.1    | 27.9    | 26.4  | 11.0    | 18.6    | <b>53.3</b> | 10.7  | 11.0  | 17.5  | <b>49.3</b> | <b>102.1</b> | 19.9    | 29.1    | 23.1        | 39.0    | 32.6        | 25.8        | 30.3        | 11.2  | 15.6    | 21.3        | 14.1    | 10.1        | 15.0    | 9.4     | 20.6        | 12.7         | 21.4  | 17.2  | 20.3    | 26.9  | 16.8  | 11.7        | Yes   |       |
| VMM 707   | 4        | 13.2 | 19.8          | 18.0    | 17.5  | 18.9  | 10.7    | 27.1    | 22.8    | 16.0    | 11.6  | 4.2     | 12.6    | 7.9         | 5.3   | 5.3   | 26.4  | 22.0        | 21.0         | 11.2    | 21.0    | 7.9         | 14.4    | 11.9        | 11.9        | 2.0         | 6.3   | 21.4    | 9.4         | 16.7    | 10.5        | 20.6    | 29.5    | 32.9        | 16.7         | 16.2  | 23.0  | 27.2    | 27.2  | 18.8  | 17.2        | No    |       |
| VMM 714   | 4        | 4.7  | 13.9          | 5.6     | 5.9   | 4.7   | X       | X       | X       | X       | X     | 7.1     | 15.0    | 11.7        | 9.0   | 8.8   | 10.5  | 15.7        | 9.7          | 8.5     | 12.7    |             |         |             |             |             |       |         |             |         |             |         |         |             |              |       |       |         |       |       |             |       |       |

Supplemental Table 4. IFN $\gamma$ -secreting cells per 100,000 CD4 T cells in peripheral blood (Direct ELISpot)

| VMM     | Arm | Pre-Treatment |       | Week 1  |       | Week 2  |                    | Week 3  |                    | Week 5  |                    | Week 8  |                      | Week 11 |                     | Week 12 |                     | Resp? |
|---------|-----|---------------|-------|---------|-------|---------|--------------------|---------|--------------------|---------|--------------------|---------|----------------------|---------|---------------------|---------|---------------------|-------|
|         |     | Control       | Tet   | Control | Tet   | Control | Tet                | Control | Tet                | Control | Tet                | Control | Tet                  | Control | Tet                 | Control | Tet                 |       |
| VMM 325 | 1   | 10.1          | 23.0  | 4.9     | 14.7  | 4.8     | <b><u>25.4</u></b> | 14.5    | 26.4               | 6.3     | 19.6               | 2.3     | <b><u>27.9</u></b>   | 8.6     | 23.6                | 6.1     | <b><u>82.2</u></b>  | Yes   |
| VMM 704 | 1   | 5.2           | 4.7   | 1.6     | 1.6   | 0.8     | 0.5                | 3.6     | 1.7                | 1.5     | 3.9                | 1.7     | 9.5                  | 2.4     | 10.0                | 2.2     | <b><u>140.5</u></b> | Yes   |
| VMM 717 | 1   | 7.2           | 11.4  | 8.1     | 5.7   | 3.4     | 8.0                | 8.9     | 8.5                | 8.0     | 16.5               | 8.4     | 14.9                 | 13.6    | 19.6                | X       | X                   | No    |
| VMM 724 | 1   | 5.3           | 7.4   | 4.8     | 5.3   | 2.9     | 5.3                | 5.5     | 4.7                | 2.0     | 2.7                | 3.2     | <b><u>39.5</u></b>   | 6.8     | <b><u>34.9</u></b>  | 7.7     | <b><u>109.7</u></b> | Yes   |
| VMM 734 | 1   | 9.5           | 8.7   | 3.7     | 6.6   | 3.4     | 6.2                | 3.4     | 8.8                | 2.3     | 4.6                | 2.0     | 7.5                  | 6.8     | 9.8                 | 5.9     | 5.6                 | No    |
| VMM 750 | 1   | 3.7           | 4.0   | 2.8     | 2.6   | 5.5     | 7.0                | 9.1     | 6.9                | 2.7     | 2.9                | 3.2     | <b><u>64.0</u></b>   | 8.3     | 23.1                | 4.6     | 19.3                | Yes   |
| VMM 769 | 1   | 4.5           | 1.9   | 7.0     | 3.6   | 3.7     | 2.8                | 9.4     | 3.9                | 4.9     | 3.0                | 0.2     | 2.5                  | 5.2     | 5.0                 | X       | X                   | No    |
| VMM 680 | 2   | 5.7           | 4.6   | 2.0     | 3.9   | 1.5     | 2.0                | 7.8     | 10.9               | 0.6     | 2.6                | 4.3     | <b><u>40.7</u></b>   | 14.5    | <b><u>47.3</u></b>  | 0.6     | 8.0                 | Yes   |
| VMM 689 | 2   | 8.4           | 6.1   | 9.2     | 8.5   | 8.0     | 5.5                | 9.2     | 15.5               | 4.9     | 6.5                | 3.6     | <b><u>74.8</u></b>   | 3.7     | <b><u>32.7</u></b>  | 3.0     | 20.9                | Yes   |
| VMM 702 | 2   | 19.4          | 17.6  | 14.1    | 10.1  | 8.3     | 7.2                | 36.4    | 23.5               | X       | X                  | 23.7    | 27.7                 | 24.8    | 20.7                | 21.1    | 26.7                | No    |
| VMM 764 | 2   | 2.8           | 5.1   | 5.4     | 7.3   | 2.8     | 5.4                | 7.8     | 7.8                | 4.3     | 5.3                | 4.9     | 8.3                  | 8.1     | 8.5                 | 8.3     | 4.3                 | No    |
| VMM 793 | 2   | 7.7           | 9.5   | 12.1    | 14.0  | 15.4    | 24.0               | 16.5    | 30.7               | 11.1    | 12.6               | 5.2     | <b><u>41.2</u></b>   | 236.0   | 291.2               | 35.8    | <b><u>173.9</u></b> | Yes   |
| VMM 831 | 2   | 151.8         | 154.0 | 194.0   | 224.9 | 32.1    | 43.3               | 34.1    | 66.5               | 15.5    | 28.6               | 16.2    | <b><u>234.4</u></b>  | 12.5    | <b><u>51.3</u></b>  | 84.2    | <b><u>284.4</u></b> | Yes   |
| VMM 851 | 2   | 9.9           | 12.2  | 4.6     | 4.8   | X       | X                  | 4.5     | 5.9                | 7.7     | 7.7                | 129.8   | <b><u>1329.2</u></b> | 8.6     | 23.6                | 13.4    | 31.0                | Yes   |
| VMM 672 | 3   | 2.3           | 2.8   | 1.4     | 1.1   | 1.1     | 4.1                | 2.7     | 7.4                | 0.9     | 3.3                | 2.4     | <b><u>25.7</u></b>   | 1.8     | 14.3                | 2.2     | <b><u>329.0</u></b> | Yes   |
| VMM 695 | 3   | 12.8          | 15.6  | 13.1    | 12.8  | 6.4     | 15.7               | 26.0    | <b><u>85.6</u></b> | 22.9    | 54.0               | 14.3    | <b><u>197.0</u></b>  | 17.3    | <b><u>200.9</u></b> | 23.2    | <b><u>230.6</u></b> | Yes   |
| VMM 720 | 3   | 5.8           | 9.3   | X       | X     | 6.7     | 5.8                | 6.3     | 7.7                | X       | X                  | 11.9    | <b><u>403.3</u></b>  | 6.5     | <b><u>198.4</u></b> | X       | X                   | Yes   |
| VMM 733 | 3   | 4.6           | 10.2  | X       | X     | 2.7     | <b><u>27.3</u></b> | X       | X                  | 8.7     | 12.6               | 5.9     | <b><u>57.4</u></b>   | 2.4     | <b><u>24.2</u></b>  | X       | X                   | Yes   |
| VMM 763 | 3   | 3.2           | 3.2   | 0.8     | 0.2   | 0.8     | 2.1                | 7.4     | 18.2               | 0.6     | 0.8                | 16.3    | <b><u>45.8</u></b>   | 19.8    | 33.9                | 16.3    | 27.8                | Yes   |
| VMM 770 | 3   | 126.0         | 121.1 | 37.6    | 42.6  | 64.8    | 79.4               | 838.2   | 797.9              | 241.9   | 268.9              | 447.5   | 478.3                | 543.1   | 640.0               | 244.9   | 328.9               | No    |
| VMM 848 | 3   | 50.9          | 50.9  | 59.0    | 64.2  | 268.1   | 285.7              | 67.6    | 93.4               | 26.3    | 27.8               | X       | X                    | 8.2     | 12.0                | 125.7   | 181.0               | No    |
| VMM 696 | 4   | 4.5           | 3.2   | 7.0     | 8.2   | 3.7     | 4.5                | 9.4     | 17.7               | 4.9     | 6.4                | 0.2     | 0.4                  | 5.2     | 11.8                | X       | X                   | No    |
| VMM 705 | 4   | 18.1          | 23.4  | 15.3    | 20.6  | 11.6    | 13.5               | 15.0    | 24.2               | 16.7    | 18.8               | 8.7     | 24.5                 | 12.0    | 9.6                 | 12.5    | 21.6                | No    |
| VMM 707 | 4   | 6.2           | 8.7   | 5.5     | 7.0   | 1.8     | 2.2                | 12.9    | 15.6               | 3.6     | 3.9                | 2.7     | 8.3                  | 8.5     | 15.4                | 10.2    | 11.6                | No    |
| VMM 714 | 4   | 3.7           | 4.8   | X       | X     | 5.3     | 5.0                | 2.4     | 4.1                | 2.8     | 8.3                | 4.5     | <b><u>115.4</u></b>  | 22.8    | <b><u>393.6</u></b> | X       | X                   | Yes   |
| VMM 718 | 4   | 9.1           | 8.8   | 5.5     | 8.5   | 4.5     | <b><u>29.7</u></b> | 18.7    | 29.1               | 5.0     | 22.0               | 4.7     | <b><u>209.6</u></b>  | 5.7     | <b><u>220.5</u></b> | 20.2    | <b><u>650.6</u></b> | Yes   |
| VMM 723 | 4   | X             | X     | 5.7     | 5.1   | 5.3     | <b><u>43.8</u></b> | 5.5     | <b><u>34.6</u></b> | 16.2    | <b><u>92.1</u></b> | 115.7   | <b><u>417.6</u></b>  | 19.3    | <b><u>182.4</u></b> | 45.5    | <b><u>298.8</u></b> | Yes   |
| VMM 810 | 4   | 7.0           | 3.9   | 9.2     | 17.7  | 15.8    | <b><u>43.0</u></b> | X       | X                  | X       | X                  | X       | X                    | X       | X                   | X       | X                   | Yes   |

Tet = Tetanus helper peptide. Control = negative control (maximum of 2-3 negative controls. "X" marks samples not collected or not evaluable. Resp = Response. Samples meet criteria for T cell response when shown in **bold and underlined**.
